# Supplementary material for: Integrated bioinformatics analysis identifies the effects of Sema3A/NRP1 signaling in oligodendrocytes after spinal cord injury in rats
Source: PeerJ journal article supplement (doi:10.7717/peerj.13856), 2022-08-16
Supplement: Original_data_and_statistical_report_of_each_graph.zip [file Original_data_and_statistical_report_of_each_graph.zip]

figure8 b

| normal motor neuron index |       |         |          |              |
|---------------------------|-------|---------|----------|--------------|
|                           | sham  | M       | M+AAV NC | M+AAV Sema3A |
| normal motor neuron       | 21    | 1.66666 | 6.33333  | 9            |
|                           | 23.33 | 3.33    | 5.33333  | 10           |
|                           | 25    | 5.66667 | 3.66667  | 15.3333      |
| Number of values          | 3     | 3       | 3        | 3            |
| Minimum                   | 21    | 1.667   | 3.667    | 9            |
| Maximum                   | 25    | 5.667   | 6.333    | 15.33        |
| Range                     | 4     | 4       | 2.667    | 6.333        |
| 10% Percentile            | 21    | 1.667   | 3.667    | 9            |
| 90% Percentile            | 25    | 5.667   | 6.333    | 15.33        |
| Mean                      | 23.11 | 3.554   | 5.111    | 11.44        |
| Std. Deviation            | 2.009 | 2.009   | 1.347    | 3.405        |
| Std. Error of Mear        | 1.16  | 1.16    | 0.7778   | 1.966        |

figure8 c

| BBB score          |            |            |      |          |
|--------------------|------------|------------|------|----------|
|                    | SCI-7d+AAV | SCI-7d+AAV | sham | SCI-7d   |
| 0                  | 21         | 21         | 21   | 21       |
| 1                  | 0.333333   | 0.454546   | 21   | 0.181818 |
| 3                  | 1.58333    | 0.636364   | 21   | 0.363636 |
| 5                  | 3.90909    | 1.7        | 21   | 0.5      |
| 7                  | 7.63636    | 2.4        | 21   | 1.83333  |
| Number of values   | 5          | 5          | 5    | 5        |
| Minimum            | 0.3333     | 0.4545     | 21   | 0.1818   |
| Maximum            | 21         | 21         | 21   | 21       |
| Range              | 20.67      | 20.55      | 0    | 20.82    |
| 10% Percentile     | 0.3333     | 0.4545     | 21   | 0.1818   |
| 90% Percentile     | 21         | 21         | 21   | 21       |
| Mean               | 6.892      | 5.238      | 21   | 4.776    |
| Std. Deviation     | 8.362      | 8.847      | 0    | 9.093    |
| Std. Error of Mear | 3.74       | 3.956      | 0    | 4.067    |
