# Supplementary material for: Integrated bioinformatics analysis identifies the effects of Sema3A/NRP1 signaling in oligodendrocytes after spinal cord injury in rats
Source: PeerJ journal article supplement (doi:10.7717/peerj.13856), 2022-08-16
Supplement: Original_data_and_statistical_report_of_each_graph.zip [file Original_data_and_statistical_report_of_each_graph.zip]

|                     | normal motor neuron index |          |          |              |
|---------------------|---------------------------|----------|----------|--------------|
|                     | sham                      | M        | M+AAV NC | M+AAV Sema3A |
|                     | 21                        | 1.66666  | 6.33333  | 9            |
|                     | 23.33                     | 3.33     | 5.333333 | 10           |
| normal motor neuron | 25                        | 5.666667 | 3.666667 | 15.33333     |
| Number of values    | 3                         | 3        | 3        | 3            |
| Minimum             | 21                        | 1.667    | 3.667    | 9            |
| Maximum             | 25                        | 5.667    | 6.333    | 15.33        |
| Range               | 4                         | 4        | 2.667    | 6.333        |
| 10% Percentile      | 21                        | 1.667    | 3.667    | 9            |
| 90% Percentile      | 25                        | 5.667    | 6.333    | 15.33        |
| Mean                | 23.11                     | 3.554    | 5.111    | 11.44        |
| Std. Deviation      | 2.009                     | 2.009    | 1.347    | 3.405        |
| Std. Error of Mear  | 1.16                      | 1.16     | 0.7778   | 1.966        |
