# Supplementary material for: Integrated bioinformatics analysis identifies the effects of Sema3A/NRP1 signaling in oligodendrocytes after spinal cord injury in rats
Source: PeerJ journal article supplement (doi:10.7717/peerj.13856), 2022-08-16
Supplement: Original_data_and_statistical_report_of_each_graph.zip [file Original_data_and_statistical_report_of_each_graph.zip]

figure5b

|                         | sham   | SCI-7d | SCI-7d+AAV Sema3A | SCI-7d+AAV NC |
|-------------------------|--------|--------|-------------------|---------------|
| Number of values        | 3      | 3      | 3                 | 4             |
| Minimum                 | 4.333  | 45     | 14                | 45            |
| Maximum                 | 8.333  | 65.33  | 19.67             | 62            |
| Range                   | 4      | 20.33  | 5.667             | 17            |
| 95% CI of median        |        |        |                   |               |
| Actual confidence level | 75.00% | 75.00% | 75.00%            | 87.50%        |
| Lower confidence limit  | 4.333  | 45     | 14                | 45            |
| Upper confidence limit  | 8.333  | 65.33  | 19.67             | 62            |
| Mean                    | 6.111  | 56.67  | 17.11             | 54.17         |
| Std. Deviation          | 2.037  | 10.49  | 2.874             | 7.356         |
| Std. Error of Mean      | 1.176  | 6.058  | 1.659             | 3.678         |

figure5c

|                         | sham   | SCI-7d | SCI-7d+AAV Sema3A | SCI-7d+AAV NC |
|-------------------------|--------|--------|-------------------|---------------|
| Number of values        | 3      | 3      | 3                 | 3             |
| Minimum                 | 17     | 94     | 36.67             | 106.7         |
| Maximum                 | 21.33  | 132.7  | 44.67             | 121           |
| Range                   | 4.333  | 38.67  | 8                 | 14.33         |
| 95% CI of median        |        |        |                   |               |
| Actual confidence level | 75.00% | 75.00% | 75.00%            | 75.00%        |
| Lower confidence limit  | 17     | 94     | 36.67             | 106.7         |
| Upper confidence limit  | 21.33  | 132.7  | 44.67             | 121           |
| Mean                    | 19.78  | 110    | 40.78             | 115.2         |
| Std. Deviation          | 2.411  | 20.18  | 4.005             | 7.56          |
| Std. Error of Mean      | 1.392  | 11.65  | 2.312             | 4.365         |

figure5d

|                         | sham   | SCI-7d | SCI-7d+AAV Sema3A | SCI-7d+AAV NC |
|-------------------------|--------|--------|-------------------|---------------|
| Number of values        | 5      | 3      | 4                 | 5             |
| Minimum                 | 0.6103 | 3.312  | 0.7851            | 1.438         |
| Maximum                 | 1.622  | 3.743  | 1.889             | 3.327         |
| Range                   | 1.012  | 0.4315 | 1.104             | 1.889         |
| 95% CI of median        |        |        |                   |               |
| Actual confidence level | 93.75% | 75.00% | 87.50%            | 93.75%        |
| Lower confidence limit  | 0.6103 | 3.312  | 0.7851            | 1.438         |
| Upper confidence limit  | 1.622  | 3.743  | 1.889             | 3.327         |
| Mean                    | 1      | 3.5    | 1.168             | 1.944         |
| Std. Deviation          | 0.3876 | 0.221  | 0.4995            | 0.7864        |
| Std. Error of Mean      | 0.1734 | 0.1276 | 0.2498            | 0.3517        |

figure5e

|                  | sham   | SCI-7d | SCI-7d+AAV Sema3A | SCI-7d+AAV NC |
|------------------|--------|--------|-------------------|---------------|
| Number of values | 6      | 6      | 6                 | 5             |
| Minimum          | 0.7501 | 1.895  | 1.119             | 1.839         |
| Maximum          | 1.532  | 3.106  | 1.764             | 3.407         |

|                         |        |        |        |        |
|-------------------------|--------|--------|--------|--------|
| Range                   | 0.7817 | 1.212  | 0.6449 | 1.569  |
| 95% CI of median        |        |        |        |        |
| Actual confidence level | 96.88% | 96.88% | 96.88% | 93.75% |
| Lower confidence limit  | 0.7501 | 1.895  | 1.119  | 1.839  |
| Upper confidence limit  | 1.532  | 3.106  | 1.764  | 3.407  |
| Mean                    | 1      | 2.42   | 1.433  | 2.51   |
| Std. Deviation          | 0.2837 | 0.4595 | 0.2895 | 0.5817 |
| Std. Error of Mean      | 0.1158 | 0.1876 | 0.1182 | 0.2602 |
