# Supplementary material for: Integrated bioinformatics analysis identifies the effects of Sema3A/NRP1 signaling in oligodendrocytes after spinal cord injury in rats
Source: PeerJ journal article supplement (doi:10.7717/peerj.13856), 2022-08-16
Supplement: Original_data_and_statistical_report_of_each_graph.zip [file Original_data_and_statistical_report_of_each_graph.zip]

figure1 a

| Number of value | 3      | 9       | 4       | 8       |
|-----------------|--------|---------|---------|---------|
| Minimum         | 0.8636 | 0.02441 | 0.06222 | 0.01403 |
| Maximum         | 1.177  | 0.1446  | 0.1514  | 0.1446  |
| Range           | 0.3134 | 0.1202  | 0.08922 | 0.1306  |

## 95% CI of median

|                   |        |         |         |         |
|-------------------|--------|---------|---------|---------|
| Actual confidence | 75.00% | 96.09%  | 87.50%  | 99.22%  |
| Lower confidence  | 0.8636 | 0.02515 | 0.06222 | 0.01403 |
| Upper confidence  | 1.177  | 0.06397 | 0.1514  | 0.1446  |

|                    |         |         |         |         |
|--------------------|---------|---------|---------|---------|
| Mean               | 1       | 0.04943 | 0.09632 | 0.07049 |
| Std. Deviation     | 0.1606  | 0.03789 | 0.04014 | 0.04079 |
| Std. Error of Mean | 0.09272 | 0.01263 | 0.02007 | 0.01442 |

figure1 b

|                 | sham   | 1day    | 7day   | 14day   |
|-----------------|--------|---------|--------|---------|
| Number of value | 8      | 7       | 5      | 5       |
| Minimum         | 0.7943 | 0.08378 | 0.1297 | 0.04112 |
| Maximum         | 1.257  | 0.7302  | 0.4336 | 0.5507  |
| Range           | 0.4624 | 0.6464  | 0.3039 | 0.5096  |

## 95% CI of median

|                   |        |         |        |         |
|-------------------|--------|---------|--------|---------|
| Actual confidence | 99.22% | 98.44%  | 93.75% | 93.75%  |
| Lower confidence  | 0.7943 | 0.08378 | 0.1297 | 0.04112 |
| Upper confidence  | 1.257  | 0.7302  | 0.4336 | 0.5507  |

|                    |         |         |         |         |
|--------------------|---------|---------|---------|---------|
| Mean               | 1.005   | 0.4535  | 0.2448  | 0.2519  |
| Std. Deviation     | 0.1947  | 0.1939  | 0.1172  | 0.19    |
| Std. Error of Mean | 0.06884 | 0.07327 | 0.05239 | 0.08498 |

figure1 c

|                 | sham   | 1day   | 7day   | 14day |
|-----------------|--------|--------|--------|-------|
| Number of value | 9      | 7      | 4      | 3     |
| Minimum         | 0.5245 | 0.2126 | 0.7934 | 3.521 |
| Maximum         | 1.135  | 0.5779 | 2.323  | 5.084 |
| Range           | 0.6106 | 0.3653 | 1.53   | 1.563 |

## 95% CI of median

|                   |        |        |        |        |
|-------------------|--------|--------|--------|--------|
| Actual confidence | 96.09% | 98.44% | 87.50% | 75.00% |
| Lower confidence  | 0.6893 | 0.2126 | 0.7934 | 3.521  |
| Upper confidence  | 1.109  | 0.5779 | 2.323  | 5.084  |

|                    |         |         |        |        |
|--------------------|---------|---------|--------|--------|
| Mean               | 0.8661  | 0.3837  | 1.637  | 4.536  |
| Std. Deviation     | 0.2076  | 0.1338  | 0.6315 | 0.8799 |
| Std. Error of Mean | 0.06919 | 0.05058 | 0.3158 | 0.508  |

figure1 d

|                 | sham   | 1day   | 7day   | 14day  |
|-----------------|--------|--------|--------|--------|
| Number of value | 4      | 7      | 7      | 10     |
| Minimum         | 0.4794 | 0.7304 | 0.6747 | 0.6789 |
| Maximum         | 0.705  | 1.306  | 1.123  | 1.6    |
| Range           | 0.2256 | 0.5761 | 0.4487 | 0.9211 |

|                    |         |         |         |         |
|--------------------|---------|---------|---------|---------|
| 95% CI of median   |         |         |         |         |
| Actual confidence  | 87.50%  | 98.44%  | 98.44%  | 97.85%  |
| Lower confidence   | 0.4794  | 0.7304  | 0.6747  | 0.7225  |
| Upper confidence   | 0.705   | 1.306   | 1.123   | 1.306   |
| Mean               | 0.598   | 0.9615  | 0.8789  | 0.9783  |
| Std. Deviation     | 0.1154  | 0.1788  | 0.1416  | 0.2866  |
| Std. Error of Mean | 0.05769 | 0.06756 | 0.05352 | 0.09062 |
