# Supplementary material for: Integrated bioinformatics analysis identifies the effects of Sema3A/NRP1 signaling in oligodendrocytes after spinal cord injury in rats
Source: PeerJ journal article supplement (doi:10.7717/peerj.13856), 2022-08-16
Supplement: Original_data_and_statistical_report_of_each_graph.zip [file Original_data_and_statistical_report_of_each_graph.zip]

figure7a

|                         | sham    | SCI-7d  | SCI-7d+AAV Sema3A | SCI-7d+AAV NC |
|-------------------------|---------|---------|-------------------|---------------|
| Minimum                 | 0.8636  | 0.04946 | 0.6654            | 0.06222       |
| Maximum                 | 1.177   | 0.4211  | 0.9027            | 0.1962        |
| Range                   | 0.3134  | 0.3717  | 0.2373            | 0.1339        |
| 95% CI of median        |         |         |                   |               |
| Actual confidence level | 75.00%  | 93.75%  | 75.00%            | 93.75%        |
| Lower confidence limit  | 0.8636  | 0.04946 | 0.6654            | 0.06222       |
| Upper confidence limit  | 1.177   | 0.4211  | 0.9027            | 0.1962        |
| Mean                    | 1       | 0.1696  | 0.7908            | 0.1163        |
| Std. Deviation          | 0.1606  | 0.1454  | 0.1192            | 0.05659       |
| Std. Error of Mean      | 0.09272 | 0.06501 | 0.06883           | 0.02531       |

figure7b

|                         | sham    | SCI-7d  | SCI-7d+AAV Sema3A | SCI-7d+AAV NC |
|-------------------------|---------|---------|-------------------|---------------|
| Minimum                 | 0.935   | 0.2918  | 0.7003            | 0.4998        |
| Maximum                 | 1.257   | 0.6183  | 0.8056            | 0.559         |
| Range                   | 0.3217  | 0.3265  | 0.1052            | 0.05918       |
| 95% CI of median        |         |         |                   |               |
| Actual confidence level | 87.50%  | 93.75%  | 75.00%            | 75.00%        |
| Lower confidence limit  | 0.935   | 0.2918  | 0.7003            | 0.4998        |
| Upper confidence limit  | 1.257   | 0.6183  | 0.8056            | 0.559         |
| Mean                    | 1.095   | 0.4463  | 0.7617            | 0.5337        |
| Std. Deviation          | 0.136   | 0.1165  | 0.05476           | 0.03055       |
| Std. Error of Mean      | 0.06798 | 0.05209 | 0.03161           | 0.01764       |

figure7c

|                         | sham    | SCI-7d | SCI-7d+AAV Sema3A | SCI-7d+AAV NC |
|-------------------------|---------|--------|-------------------|---------------|
| Minimum                 | 0.6228  | 1.248  | 0.1205            | 1.257         |
| Maximum                 | 0.9527  | 2.323  | 1.295             | 2.334         |
| Range                   | 0.3299  | 1.075  | 1.175             | 1.078         |
| 95% CI of median        |         |        |                   |               |
| Actual confidence level | 99.22%  | 96.88% | 98.83%            | 93.75%        |
| Lower confidence limit  | 0.6228  | 1.248  | 0.1278            | 1.257         |
| Upper confidence limit  | 0.9527  | 2.323  | 1.089             | 2.334         |
| Mean                    | 0.7689  | 1.739  | 0.5113            | 1.858         |
| Std. Deviation          | 0.1045  | 0.3427 | 0.4285            | 0.4646        |
| Std. Error of Mean      | 0.03694 | 0.1399 | 0.1292            | 0.2078        |

figure7d

|                         | sham   | SCI-7d | SCI-7d+AAV Sema3A | SCI-7d+AAV NC |
|-------------------------|--------|--------|-------------------|---------------|
| Minimum                 | 0.2696 | 0.6031 | 0.08335           | 0.8406        |
| Maximum                 | 1.391  | 1.655  | 0.7811            | 1.151         |
| Range                   | 1.121  | 1.052  | 0.6977            | 0.3107        |
| 95% CI of median        |        |        |                   |               |
| Actual confidence level | 98.83% | 98.83% | 98.83%            | 96.88%        |
| Lower confidence limit  | 0.3233 | 0.6747 | 0.2384            | 0.8406        |
| Upper confidence limit  | 0.9097 | 1.244  | 0.6507            | 1.151         |
| Mean                    | 0.5839 | 1.049  | 0.4441            | 0.996         |

|                    |        |         |        |         |
|--------------------|--------|---------|--------|---------|
| Std. Deviation     | 0.3346 | 0.303   | 0.2073 | 0.1133  |
| Std. Error of Mean | 0.1009 | 0.09136 | 0.0625 | 0.04627 |

figure7e

|         | sham   | SCI-14d | SCI-14d+AAV Sema3/ | SCI-14d+AAV NC |
|---------|--------|---------|--------------------|----------------|
| Minimum | 0.6289 | 0.0278  | 0.002882           | 0.01403        |
| Maximum | 1.177  | 0.1334  | 0.0831             | 0.2493         |
| Range   | 0.5481 | 0.1056  | 0.08022            | 0.2353         |

95% CI of median

|                         |        |        |         |         |
|-------------------------|--------|--------|---------|---------|
| Actual confidence level | 93.75% | 96.88% | 97.85%  | 99.22%  |
| Lower confidence limit  | 0.6289 | 0.0278 | 0.01578 | 0.01403 |
| Upper confidence limit  | 1.177  | 0.1334 | 0.07559 | 0.2493  |

|                    |        |         |          |         |
|--------------------|--------|---------|----------|---------|
| Mean               | 0.8563 | 0.07977 | 0.04888  | 0.07295 |
| Std. Deviation     | 0.2273 | 0.03954 | 0.02661  | 0.07883 |
| Std. Error of Mean | 0.1017 | 0.01614 | 0.008415 | 0.02787 |

figure7f

|         | sham   | SCI-14d | SCI-14d+AAV Sema3/ | SCI-14d+AAV NC |
|---------|--------|---------|--------------------|----------------|
| Minimum | 0.5074 | 0.1713  | 0.2148             | 0.2729         |
| Maximum | 1.177  | 0.3035  | 0.5097             | 0.5572         |
| Range   | 0.6697 | 0.1322  | 0.2949             | 0.2843         |

95% CI of median

|                         |        |        |        |        |
|-------------------------|--------|--------|--------|--------|
| Actual confidence level | 96.88% | 96.88% | 93.75% | 96.88% |
| Lower confidence limit  | 0.5074 | 0.1713 | 0.2148 | 0.2729 |
| Upper confidence limit  | 1.177  | 0.3035 | 0.5097 | 0.5572 |

|                    |         |         |         |         |
|--------------------|---------|---------|---------|---------|
| Mean               | 0.9026  | 0.2211  | 0.355   | 0.4159  |
| Std. Deviation     | 0.2231  | 0.04455 | 0.1361  | 0.1223  |
| Std. Error of Mean | 0.09109 | 0.01819 | 0.06088 | 0.04995 |

figure7g

|         | sham   | SCI-14d | SCI-14d+AAV Sema3/ | SCI-14d+AAV NC |
|---------|--------|---------|--------------------|----------------|
| Minimum | 0.6228 | 2.234   | 0.1161             | 1.903          |
| Maximum | 1.135  | 3.882   | 1.903              | 3.521          |
| Range   | 0.5122 | 1.648   | 1.787              | 1.618          |

95% CI of median

|                         |        |        |        |        |
|-------------------------|--------|--------|--------|--------|
| Actual confidence level | 98.83% | 93.75% | 96.09% | 87.50% |
| Lower confidence limit  | 0.7047 | 2.234  | 0.1297 | 1.903  |
| Upper confidence limit  | 1.109  | 3.882  | 0.4152 | 3.521  |

|                    |        |        |        |        |
|--------------------|--------|--------|--------|--------|
| Mean               | 0.9022 | 3.095  | 0.4242 | 2.495  |
| Std. Deviation     | 0.1628 | 0.7627 | 0.5631 | 0.7074 |
| Std. Error of Mean | 0.0491 | 0.3411 | 0.1877 | 0.3537 |
