# Supplementary material for: Integrated bioinformatics analysis identifies the effects of Sema3A/NRP1 signaling in oligodendrocytes after spinal cord injury in rats
Source: PeerJ journal article supplement (doi:10.7717/peerj.13856), 2022-08-16
Supplement: Original_data_and_statistical_report_of_each_graph.zip [file Original_data_and_statistical_report_of_each_graph.zip]

# BBB score

|   | SCI-7d+AAV<br>Sema3A | SCI-<br>7d+AAV | sham | SCI-7d   |
|---|----------------------|----------------|------|----------|
| 0 | 21                   | 21             | 21   | 21       |
| 1 | 0.333333             | 0.454546       | 21   | 0.181818 |
| 3 | 1.583333             | 0.636364       | 21   | 0.363636 |
| 5 | 3.909091             | 1.7            | 21   | 0.5      |
| 7 | 7.636364             | 2.4            | 21   | 1.833333 |

  

|                    | SCI-7d+AAV<br>Sema3A | SCI-<br>7d+AAV | sham | SCI-7d |
|--------------------|----------------------|----------------|------|--------|
| Number of values   | 5                    | 5              | 5    | 5      |
| Minimum            | 0.3333               | 0.4545         | 21   | 0.1818 |
| Maximum            | 21                   | 21             | 21   | 21     |
| Range              | 20.67                | 20.55          | 0    | 20.82  |
| 10% Percentile     | 0.3333               | 0.4545         | 21   | 0.1818 |
| 90% Percentile     | 21                   | 21             | 21   | 21     |
| Mean               | 6.892                | 5.238          | 21   | 4.776  |
| Std. Deviation     | 8.362                | 8.847          | 0    | 9.093  |
| Std. Error of Mean | 3.74                 | 3.956          | 0    | 4.067  |
