# Supplementary material for: Integrated bioinformatics analysis identifies the effects of Sema3A/NRP1 signaling in oligodendrocytes after spinal cord injury in rats
Source: PeerJ journal article supplement (doi:10.7717/peerj.13856), 2022-08-16
Supplement: Original_data_and_statistical_report_of_each_graph.zip [file Original_data_and_statistical_report_of_each_graph.zip]

figure2d-left

|                         |         |        |
|-------------------------|---------|--------|
| Number of values        | 3       | 5      |
| Minimum                 | 0.7743  | 2.554  |
| Maximum                 | 1.073   | 3.743  |
| Range                   | 0.2982  | 1.189  |
| 95% CI of median        |         |        |
| Actual confidence level | 75.00%  | 93.75% |
| Lower confidence limit  | 0.7743  | 2.554  |
| Upper confidence limit  | 1.073   | 3.743  |
| Mean                    | 0.9226  | 3.26   |
| Std. Deviation          | 0.1491  | 0.4384 |
| Std. Error of Mean      | 0.08609 | 0.1961 |

figure2d-right

|                         |         |        |
|-------------------------|---------|--------|
| Number of values        | 5       | 5      |
| Minimum                 | 0.8074  | 1.361  |
| Maximum                 | 1.16    | 1.916  |
| Range                   | 0.353   | 0.5549 |
| 95% CI of median        |         |        |
| Actual confidence level | 93.75%  | 93.75% |
| Lower confidence limit  | 0.8074  | 1.361  |
| Upper confidence limit  | 1.16    | 1.916  |
| Mean                    | 1.008   | 1.64   |
| Std. Deviation          | 0.1372  | 0.2571 |
| Std. Error of Mean      | 0.06135 | 0.115  |
| Std. Error of Mean      | 0.06135 | 0.115  |
