# Supplementary material for: Integrated bioinformatics analysis identifies the effects of Sema3A/NRP1 signaling in oligodendrocytes after spinal cord injury in rats
Source: PeerJ. 2022 Aug 16;10:e13856. doi: 10.7717/peerj.13856 (PMC9390322; doi:10.7717/peerj.13856)
Supplement: Supplemental Information 6 [file peerj-10-13856-s010.zip]

Archive with 20 entries (20 files):
- WB/20210926_1317_6.ai
- WB/20210926_1317_6.pdf
- WB/20210926_1333_5.ai
- WB/20210926_1333_5.pdf
- WB/20210926_1348  3.ai
- WB/20210926_1348  3.pdf
- WB/20210926_1357.ai  6.ai
- WB/20210926_1357.ai  6.pdf
- WB/20210926_1401.ai 5.ai
- WB/20210926_1401.ai 5.pdf
- WB/20210926_1415_5.ai  3.ai
- WB/20210926_1415_5.ai  3.pdf
- WB/20210929_1540_5.ai
- WB/20210929_1540_5.pdf
- WB/20210929_1549_5.ai
- WB/20210929_1549_5.pdf
- WB/20210929_1558_3.ai
- WB/20210929_1558_3.pdf
- WB/20210929_1607_5.ai
- WB/20210929_1607_5.pdf
