# Supplementary material for: Integrated bioinformatics analysis identifies the effects of Sema3A/NRP1 signaling in oligodendrocytes after spinal cord injury in rats
Source: PeerJ. 2022 Aug 16;10:e13856. doi: 10.7717/peerj.13856 (PMC9390322; doi:10.7717/peerj.13856)
Supplement: Table S1 — all NRP1-involved pathways that we summarized from all pathway enrichment results. [file peerj-10-13856-s003.xlsx]

## Sheet: Sheet1
ONTOLOGY	ID	Description	GeneRatio	BgRatio	pvalue	p.adjust	qvalue	geneID
BP	GO:0001655	urogenital system development	23/270	405/17962	5.32382e-08	1.01752e-05	7.045e-06	Fstl3/Bmp2/Igf1/Pdgfra/Ctsh/Dcn/Tgfbr1/Mef2c/Myc/Aldh1a2/Sox11/Prom1/Itgb4/Rbp4/Mmp2/Serpinf1/Adamts1/Nog/Nrp1/Ptpro/Wnt4/Sdc1/Spry1	23
BP	GO:0072001	renal system development	21/270	355/17962	1.04386e-07	1.45652e-05	1.00846e-05	Fstl3/Bmp2/Pdgfra/Ctsh/Dcn/Tgfbr1/Mef2c/Myc/Aldh1a2/Sox11/Prom1/Itgb4/Rbp4/Serpinf1/Adamts1/Nog/Nrp1/Ptpro/Wnt4/Sdc1/Spry1	21
BP	GO:1901342	regulation of vasculature development	20/270	338/17962	2.11116e-07	2.5059e-05	1.73502e-05	Nos3/Cth/Sphk1/Spry2/Ptn/Ppp1r15a/Ctsh/Dcn/Ecscr/Serpine1/Nfatc1/Lrg1/Tnfrsf12a/Serpinf1/Nrp1/Cyp1b1/Wnt4/Hhex/Ccl2/Stab1	20
BP	GO:0032103	positive regulation of response to external stimulus	19/270	320/17962	4.06644e-07	4.09919e-05	2.83817e-05	P2ry12/Tac1/Ptn/Ccr1/Il6/Nupr1/S100a8/Serpine1/S100a9/Cxcl1/Gja1/Trem2/Ccl7/Arg1/RT1-S3/Nrp1/Tnfsf4/Ccl2/Cxcl12	19
BP	GO:0061138	morphogenesis of a branching epithelium	15/270	221/17962	1.33413e-06	0.000103486	7.16512e-05	Bmp2/Igf1/Spry2/Pdgfra/Ctsh/Il6/Socs3/Myc/Nfatc1/Nog/Nrp1/Wnt4/Hhex/Spry1/Cxcl12	15
BP	GO:0001763	morphogenesis of a branching structure	15/270	240/17962	3.7081e-06	0.000211781	0.000146631	Bmp2/Igf1/Spry2/Pdgfra/Ctsh/Il6/Socs3/Myc/Nfatc1/Nog/Nrp1/Wnt4/Hhex/Spry1/Cxcl12	15
BP	GO:0045765	regulation of angiogenesis	17/270	305/17962	3.94644e-06	0.000218277	0.000151129	Nos3/Sphk1/Spry2/Ptn/Ppp1r15a/Ctsh/Dcn/Ecscr/Serpine1/Lrg1/Tnfrsf12a/Serpinf1/Nrp1/Cyp1b1/Hhex/Ccl2/Stab1	17
BP	GO:0048754	branching morphogenesis of an epithelial tube	13/270	184/17962	4.40133e-06	0.000235483	0.000163042	Bmp2/Igf1/Spry2/Pdgfra/Ctsh/Myc/Nfatc1/Nog/Nrp1/Wnt4/Hhex/Spry1/Cxcl12	13
BP	GO:0001525	angiogenesis	22/270	494/17962	6.02555e-06	0.000292128	0.000202261	Nos3/Sphk1/Spry2/Ptn/Pdgfra/Ppp1r15a/Ctsh/Dcn/Tgfbr1/Apln/Ecscr/Serpine1/Lrg1/Tnfrsf12a/Mmp2/Serpinf1/Nrp1/Cyp1b1/Hhex/Ccl2/Stab1/Cxcl12	22
BP	GO:0010631	epithelial cell migration	15/270	287/17962	3.11676e-05	0.00106431	0.000736896	Nos3/Hbegf/Igf1/Tac1/Ptn/Ctsh/Dcn/Tgfbr1/Mef2c/Serpine1/Nr2f2/Scarb1/Serpinf1/Nrp1/Cyp1b1	15
BP	GO:0090132	epithelium migration	15/270	289/17962	3.3766e-05	0.00114309	0.000791448	Nos3/Hbegf/Igf1/Tac1/Ptn/Ctsh/Dcn/Tgfbr1/Mef2c/Serpine1/Nr2f2/Scarb1/Serpinf1/Nrp1/Cyp1b1	15
BP	GO:0001558	regulation of cell growth	19/270	436/17962	3.5425e-05	0.00118901	0.000823237	Cth/Ifrd1/Hbegf/Sphk1/Igf1/Atad3a/Socs3/Tgfbr1/Sertad1/Igfbp5/Gal/Hspa1a/Fdps/Gja1/Enpp1/Tnfrsf12a/Nrp1/Cxcl12/Akap6	19
BP	GO:0090130	tissue migration	15/270	296/17962	4.44272e-05	0.00137375	0.000951144	Nos3/Hbegf/Igf1/Tac1/Ptn/Ctsh/Dcn/Tgfbr1/Mef2c/Serpine1/Nr2f2/Scarb1/Serpinf1/Nrp1/Cyp1b1	15
BP	GO:0051271	negative regulation of cellular component movement	16/270	332/17962	4.53765e-05	0.00138606	0.000959672	Nbl1/Ptn/Dcn/Mef2c/Igfbp5/Col3a1/Serpine1/Nr2f2/Actn1/Serpinf1/Nog/Nrp1/Cyp1b1/Wnt4/Ccl2/Cxcl12	16
BP	GO:0032102	negative regulation of response to external stimulus	16/270	337/17962	5.42079e-05	0.00154656	0.0010708	Gpx2/Il1r2/Igf1/Nbl1/Pdgfra/Socs3/Serpine1/Tspan8/Gja1/Serping1/Tnfaip6/Slpi/Serpinf1/Nrp1/Wnt4/Ccl2	16
BP	GO:0003206	cardiac chamber morphogenesis	10/270	143/17962	6.16301e-05	0.00168071	0.00116367	Nos3/Dhrs3/Tgfbr1/Mef2c/Sox11/Nfatc1/Rbp4/Adamts1/Nog/Nrp1	10
BP	GO:0001667	ameboidal-type cell migration	18/270	417/17962	6.4348e-05	0.0017074	0.00118215	Nos3/P2ry12/Hbegf/Igf1/Tac1/Ptn/Ctsh/Dcn/Tgfbr1/Mef2c/Itgb4/Serpine1/Nr2f2/Scarb1/Serpinf1/Nrp1/Cyp1b1/Cxcl12	18
BP	GO:0050921	positive regulation of chemotaxis	10/270	147/17962	7.77522e-05	0.00192313	0.00133152	P2ry12/Ptn/Ccr1/Serpine1/Gja1/Trem2/Ccl7/Nrp1/Ccl2/Cxcl12	10
BP	GO:0040013	negative regulation of locomotion	16/270	349/17962	8.18449e-05	0.00195875	0.00135618	Nbl1/Ptn/Dcn/Mef2c/Igfbp5/Col3a1/Trim5/Serpine1/Nr2f2/Serpinf1/Nog/Nrp1/Cyp1b1/Wnt4/Ccl2/Cxcl12	16
BP	GO:0060485	mesenchyme development	14/270	278/17962	8.51716e-05	0.00199284	0.00137978	Nos3/Bmp2/Il6/Tgfbr1/Mef2c/Myc/Aldh1a2/Sox11/Col1a1/Nfatc1/Nog/Nrp1/Wnt4/Spry1	14
BP	GO:0021536	diencephalon development	8/270	95/17962	9.23457e-05	0.00210729	0.00145903	Bmp2/Ptn/Crh/Myc/Aldh1a2/Nog/Nrp1/Wnt4	8
BP	GO:0048762	mesenchymal cell differentiation	12/270	217/17962	0.000113875	0.00247064	0.0017106	Bmp2/Il6/Tgfbr1/Mef2c/Aldh1a2/Sox11/Col1a1/Nfatc1/Nog/Nrp1/Wnt4/Spry1	12
BP	GO:0050920	regulation of chemotaxis	12/270	222/17962	0.000141093	0.00295847	0.00204836	P2ry12/Nbl1/Ptn/Pdgfra/Ccr1/Serpine1/Gja1/Trem2/Ccl7/Nrp1/Ccl2/Cxcl12	12
BP	GO:0010632	regulation of epithelial cell migration	12/270	229/17962	0.000188447	0.00363225	0.00251487	Nos3/Hbegf/Igf1/Tac1/Ptn/Ctsh/Dcn/Mef2c/Serpine1/Nr2f2/Serpinf1/Nrp1	12
BP	GO:0003205	cardiac chamber development	11/270	196/17962	0.000192347	0.00365784	0.00253259	Nos3/Igf1/Dhrs3/Tgfbr1/Mef2c/Sox11/Nfatc1/Rbp4/Adamts1/Nog/Nrp1	11
BP	GO:0050731	positive regulation of peptidyl-tyrosine phosphorylation	11/270	198/17962	0.000210102	0.00383894	0.00265797	Hbegf/Igf1/Il11/Pdgfra/Il6/Trem2/Ncf1/Cd4/Afap1l2/Nrp1/Vtn	11
BP	GO:0060562	epithelial tube morphogenesis	16/270	379/17962	0.000210903	0.00383894	0.00265797	Bmp2/Igf1/Spry2/Pdgfra/Ctsh/Mef2c/Myc/Sox11/Gja1/Nfatc1/Nog/Nrp1/Wnt4/Hhex/Spry1/Cxcl12	16
BP	GO:0043542	endothelial cell migration	11/270	203/17962	0.000260665	0.00448962	0.00310849	Nos3/Igf1/Ptn/Dcn/Tgfbr1/Mef2c/Nr2f2/Scarb1/Serpinf1/Nrp1/Cyp1b1	11
BP	GO:0060411	cardiac septum morphogenesis	7/270	86/17962	0.000313426	0.00521536	0.00361097	Nos3/Dhrs3/Tgfbr1/Sox11/Nfatc1/Nog/Nrp1	7
BP	GO:0030900	forebrain development	18/270	495/17962	0.000526059	0.00719802	0.00498371	P2ry12/Mfsd2a/Bmp2/Eif2b3/Ptn/Crh/Mef2c/Myc/Aldh1a2/Col3a1/Nr2f2/Enpp1/Hsd17b7/Nog/Nrp1/Wnt4/Hhex/Cxcl12	18
BP	GO:0021761	limbic system development	9/270	155/17962	0.000571228	0.00763062	0.00528323	Mfsd2a/Eif2b3/Crh/Mef2c/Myc/Enpp1/Hsd17b7/Nog/Nrp1	9
BP	GO:0022612	gland morphogenesis	9/270	158/17962	0.000655903	0.00841742	0.00582799	Igf1/Ptn/Il6/Igfbp5/Arg1/Mmp2/Nog/Nrp1/Wnt4	9
BP	GO:2001233	regulation of apoptotic signaling pathway（凋亡）	16/270	421/17962	0.000668365	0.00843523	0.00584032	Cth/Igf1/Ctsh/Tgfbr1/Myc/Nupr1/S100a8/Hspa1a/Serpine1/S100a9/Tnfrsf12a/Nog/Nrp1/Wnt4/Vnn1/Cxcl12	16
BP	GO:0070371	ERK1 and ERK2 cascade	14/270	344/17962	0.000745647	0.00903751	0.00625733	Bmp2/Igf1/Spry2/Pdgfra/Ctsh/Ccr1/Il6/Myc/Trem2/Ccl7/Cd4/Nrp1/Ccl2/Spry1	14
BP	GO:0050730	regulation of peptidyl-tyrosine phosphorylation	12/270	269/17962	0.000801904	0.00957167	0.00662716	Hbegf/Igf1/Il11/Pdgfra/Il6/Socs3/Trem2/Ncf1/Cd4/Afap1l2/Nrp1/Vtn	12
BP	GO:0035924	cellular response to vascular endothelial growth factor stimulus	5/270	56/17962	0.00151118	0.0147387	0.0102047	Sphk1/Spry2/Pdgfra/Dcn/Nrp1	5
BP	GO:0018108	peptidyl-tyrosine phosphorylation	14/270	373/17962	0.00160994	0.0152862	0.0105837	Hbegf/Igf1/Il11/Pdgfra/Il6/Socs3/Efemp1/Trem2/Ncf1/Cd4/Afap1l2/Nrp1/Dyrk2/Vtn	14
BP	GO:0018212	peptidyl-tyrosine modification	14/270	376/17962	0.0017343	0.0161443	0.0111779	Hbegf/Igf1/Il11/Pdgfra/Il6/Socs3/Efemp1/Trem2/Ncf1/Cd4/Afap1l2/Nrp1/Dyrk2/Vtn	14
BP	GO:0043010	camera-type eye development	14/270	377/17962	0.00177749	0.016424	0.0113715	Nos3/Ptn/Pdgfra/Tgfbr1/Aldh1a2/Sox11/Prom1/Efemp1/Maf/Gja1/Rbp4/Serpinf1/Nrp1/Cyp1b1	14
BP	GO:0045785	positive regulation of cell adhesion	15/270	424/17962	0.00197811	0.0175748	0.0121683	Fstl3/P2ry12/Igf1/Ccdc80/Ptn/Il6/Cd4/RT1-S3/Nrp1/Wnt4/Tnfsf4/Vtn/Ccl2/Vnn1/Cxcl12	15
BP	GO:0038084	vascular endothelial growth factor signaling pathway	4/270	37/17962	0.0022324	0.0191411	0.0132528	Spry2/Pdgfra/Dcn/Nrp1	4
BP	GO:0150063	visual system development	15/270	430/17962	0.00226326	0.0193214	0.0133776	Nos3/P2ry12/Ptn/Pdgfra/Tgfbr1/Aldh1a2/Sox11/Prom1/Efemp1/Maf/Gja1/Rbp4/Serpinf1/Nrp1/Cyp1b1	15
BP	GO:0030307	positive regulation of cell growth	9/270	191/17962	0.00245831	0.0206917	0.0143264	Hbegf/Sphk1/Igf1/Tgfbr1/Fdps/Tnfrsf12a/Nrp1/Cxcl12/Akap6	9
BP	GO:0048880	sensory system development	15/270	434/17962	0.00247172	0.0206961	0.0143294	Nos3/P2ry12/Ptn/Pdgfra/Tgfbr1/Aldh1a2/Sox11/Prom1/Efemp1/Maf/Gja1/Rbp4/Serpinf1/Nrp1/Cyp1b1	15
BP	GO:0045926	negative regulation of growth	11/270	268/17962	0.00252586	0.0210596	0.0145811	Cth/Ifrd1/Sertad1/Igfbp5/Gal/Hspa1a/Gja1/Enpp1/Rbp4/Nog/Nrp1	11
BP	GO:2001234	negative regulation of apoptotic signaling pathway	10/270	232/17962	0.00276131	0.0221752	0.0153535	Cth/Igf1/Tgfbr1/Hspa1a/Serpine1/Nog/Nrp1/Wnt4/Vnn1/Cxcl12	10
BP	GO:0010594	regulation of endothelial cell migration	8/270	160/17962	0.00294098	0.0234264	0.0162198	Nos3/Igf1/Ptn/Dcn/Mef2c/Nr2f2/Serpinf1/Nrp1	8
BP	GO:0070374	positive regulation of ERK1 and ERK2 cascade	10/270	236/17962	0.00312085	0.0245444	0.0169938	Bmp2/Spry2/Pdgfra/Ccr1/Il6/Trem2/Ccl7/Cd4/Nrp1/Ccl2	10
BP	GO:0048638	regulation of developmental growth	14/270	404/17962	0.00332955	0.0255415	0.0176843	Ifrd1/Igf1/Tgfbr1/Mef2c/Gal/Fdps/Serpine1/Gja1/Tnfrsf12a/Rbp4/Nog/Nrp1/Cxcl12/Akap6	14
BP	GO:0003279	cardiac septum development	7/270	129/17962	0.00338267	0.0257937	0.0178588	Nos3/Dhrs3/Tgfbr1/Sox11/Nfatc1/Nog/Nrp1	7
BP	GO:0070372	regulation of ERK1 and ERK2 cascade	12/270	324/17962	0.00378619	0.0279246	0.0193343	Bmp2/Igf1/Spry2/Pdgfra/Ccr1/Il6/Trem2/Ccl7/Cd4/Nrp1/Ccl2/Spry1	12
BP	GO:0048010	vascular endothelial growth factor receptor signaling pathway	4/270	43/17962	0.00388821	0.028276	0.0195775	Nrp1/Hhex/Tmem204/Ccl2	4
BP	GO:0045666	positive regulation of neuron differentiation	15/270	472/17962	0.00536662	0.0357805	0.0247734	Sphk1/Bmp2/Nbl1/Ptn/Il6/Il1rap/Mef2c/Sox11/S100a9/Tnfrsf12a/Plxnc1/Serpinf1/Adamts1/Nrp1/Cxcl12	15
BP	GO:0001654	eye development	14/270	427/17962	0.00540121	0.0359501	0.0248908	Nos3/Ptn/Pdgfra/Tgfbr1/Aldh1a2/Sox11/Prom1/Efemp1/Maf/Gja1/Rbp4/Serpinf1/Nrp1/Cyp1b1	14
BP	GO:0031346	positive regulation of cell projection organization	15/270	479/17962	0.00612085	0.0389796	0.0269884	P2ry12/Sphk1/Ptn/Il6/Lcn2/Tgfbr1/Il1rap/Efemp1/S100a9/Tnfrsf12a/Plxnc1/Serpinf1/Adamts1/Nrp1/Cxcl12	15
BP	GO:0010634	positive regulation of epithelial cell migration	7/270	144/17962	0.00615671	0.0389796	0.0269884	Nos3/Hbegf/Igf1/Tac1/Ctsh/Serpine1/Nrp1	7
BP	GO:0031589	cell-substrate adhesion	12/270	347/17962	0.00646836	0.0398764	0.0276093	Ccdc80/Ptn/Col3a1/Nid2/Itgb4/Serpine1/Col1a1/Tnfrsf12a/Actn1/Nrp1/Wnt4/Vtn	12
BP	GO:0061298	retina vasculature development in camera-type eye	3/270	26/17962	0.00676273	0.0407846	0.0282382	Pdgfra/Nrp1/Cyp1b1	3
BP	GO:0045927	positive regulation of growth	11/270	306/17962	0.00679224	0.0407846	0.0282382	Hbegf/Sphk1/Igf1/Tgfbr1/Mef2c/Fdps/Serpine1/Tnfrsf12a/Nrp1/Cxcl12/Akap6	11
BP	GO:0003151	outflow tract morphogenesis	5/270	82/17962	0.00787981	0.0459792	0.0318347	Dhrs3/Mef2c/Sox11/Nog/Nrp1	5
BP	GO:0021854	hypothalamus development	3/270	28/17962	0.0083353	0.0477154	0.0330368	Crh/Myc/Nrp1	3
BP	GO:0021543	pallium development	9/270	234/17962	0.00911512	0.0497254	0.0344285	P2ry12/Mfsd2a/Eif2b3/Mef2c/Col3a1/Enpp1/Hsd17b7/Nog/Nrp1	9
BP	GO:0006929	substrate-dependent cell migration	3/270	29/17962	0.0091953	0.0497254	0.0344285	P2ry12/Tnfrsf12a/Nrp1	3
BP	GO:0060041	retina development in camera-type eye	8/270	194/17962	0.00920067	0.0497254	0.0344285	Nos3/Ptn/Pdgfra/Prom1/Rbp4/Serpinf1/Nrp1/Cyp1b1	8
BP	GO:0051496	positive regulation of stress fiber assembly	4/270	57/17962	0.0105716	0.0541258	0.0374753	Tac1/Tgfbr1/Nrp1/Wnt4	4
BP	GO:0030308	negative regulation of cell growth	8/270	200/17962	0.0109286	0.0553163	0.0382995	Cth/Ifrd1/Sertad1/Gal/Hspa1a/Gja1/Enpp1/Nrp1	8
BP	GO:0021559	trigeminal nerve development	2/270	11/17962	0.0113216	0.0553163	0.0382995	Tifab/Nrp1	2
BP	GO:0060600	dichotomous subdivision of an epithelial terminal unit	2/270	11/17962	0.0113216	0.0553163	0.0382995	Ctsh/Nrp1	2
BP	GO:0031032	actomyosin structure organization	8/270	202/17962	0.0115546	0.0562269	0.03893	Csrp3/Tac1/Pdgfra/Tgfbr1/Mef2c/Actn1/Nrp1/Wnt4	8
BP	GO:1904018	positive regulation of vasculature development	8/270	203/17962	0.0118774	0.0575555	0.0398499	Nos3/Cth/Sphk1/Ctsh/Serpine1/Lrg1/Nrp1/Cyp1b1	8
BP	GO:0021537	telencephalon development	11/270	334/17962	0.0125619	0.0599402	0.0415009	P2ry12/Mfsd2a/Bmp2/Eif2b3/Mef2c/Col3a1/Enpp1/Hsd17b7/Nog/Nrp1/Cxcl12	11
BP	GO:0032488	Cdc42 protein signal transduction	2/270	12/17962	0.0134522	0.0612842	0.0424315	Abca1/Nrp1	2
BP	GO:0061299	retina vasculature morphogenesis in camera-type eye	2/270	12/17962	0.0134522	0.0612842	0.0424315	Nrp1/Cyp1b1	2
BP	GO:1902287	semaphorin-plexin signaling pathway involved in axon guidance	2/270	12/17962	0.0134522	0.0612842	0.0424315	Plxnc1/Nrp1	2
BP	GO:0007160	cell-matrix adhesion	8/270	209/17962	0.0139553	0.0632093	0.0437644	Col3a1/Nid2/Itgb4/Serpine1/Actn1/Nrp1/Wnt4/Vtn	8
BP	GO:0008045	motor neuron axon guidance	3/270	34/17962	0.0142542	0.0637544	0.0441418	Nog/Nrp1/Cxcl12	3
BP	GO:0048640	negative regulation of developmental growth	6/270	132/17962	0.0148259	0.0659359	0.0456522	Ifrd1/Gal/Gja1/Rbp4/Nog/Nrp1	6
BP	GO:1902285	semaphorin-plexin signaling pathway involved in neuron projection guidance	2/270	13/17962	0.0157419	0.067635	0.0468286	Plxnc1/Nrp1	2
BP	GO:2001237	negative regulation of extrinsic apoptotic signaling pathway	5/270	99/17962	0.016843	0.0715055	0.0495085	Igf1/Tgfbr1/Hspa1a/Serpine1/Nrp1	5
MF	GO:0005539	glycosaminoglycan binding	17/247	209/16882	1.22286e-08	6.05061e-06	4.90405e-06	Hbegf/Ccdc80/Prelp/Cfh/Ptn/Dcn/Bgn/Trem2/Ccl7/Tnfaip6/Pcolce/Adamts1/Nrp1/Ncan/Vtn/Ccl2/Stab1	17
MF	GO:0019838	growth factor binding	12/247	146/16882	1.60548e-06	0.000205903	0.000166886	Il1r2/Ptn/Pdgfra/Tgfbr1/Il1rap/Igfbp5/Col1a2/Col3a1/Itgb4/Col1a1/Igfbp6/Nrp1	12
MF	GO:1901681	sulfur compound binding	14/247	250/16882	1.97113e-05	0.00103256	0.000836895	Fst/Hbegf/Ccdc80/Prelp/Cfh/Ptn/Sult1a1/Gstm2/Ccl7/Pcolce/Adamts1/Nrp1/Vtn/Ccl2	14
MF	GO:0008201	heparin binding	11/247	157/16882	2.01279e-05	0.00103256	0.000836895	Hbegf/Ccdc80/Prelp/Cfh/Ptn/Ccl7/Pcolce/Adamts1/Nrp1/Vtn/Ccl2	11
MF	GO:0008047	enzyme activator activity	15/247	432/16882	0.00180549	0.0225906	0.0183098	Bmp2/Rgs16/Igf1/Spry2/Ctsh/Nupr1/Rgs10/Srebf1/Adap2/Arhgap15/Pcolce/Ncf1/Afap1l2/Nrp1/Irgm	15
