# Supplementary figures and images for: Integrated bioinformatics analysis identifies the effects of Sema3A/NRP1 signaling in oligodendrocytes after spinal cord injury in rats
Source: PeerJ journal article supplement (doi:10.7717/peerj.13856), 2022-08-16

$\beta$ -actin

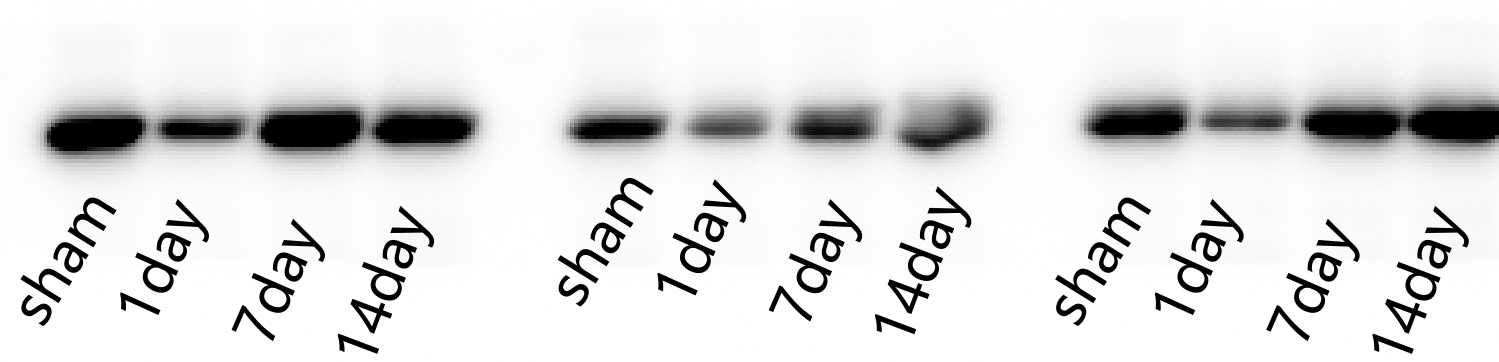

Supplement: WB_(2).zip [file WB_%282%29.zip]

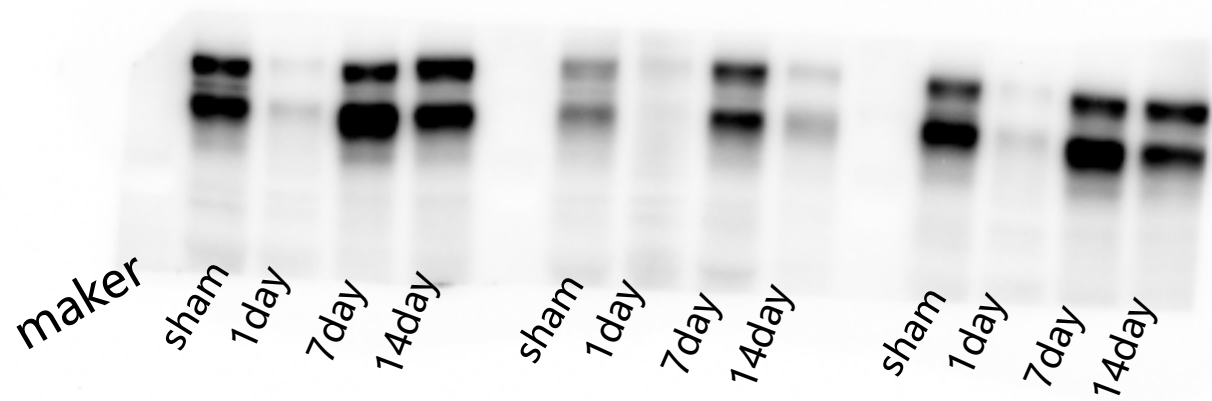

Supplement: WB_(2).zip [file WB_%282%29.zip]

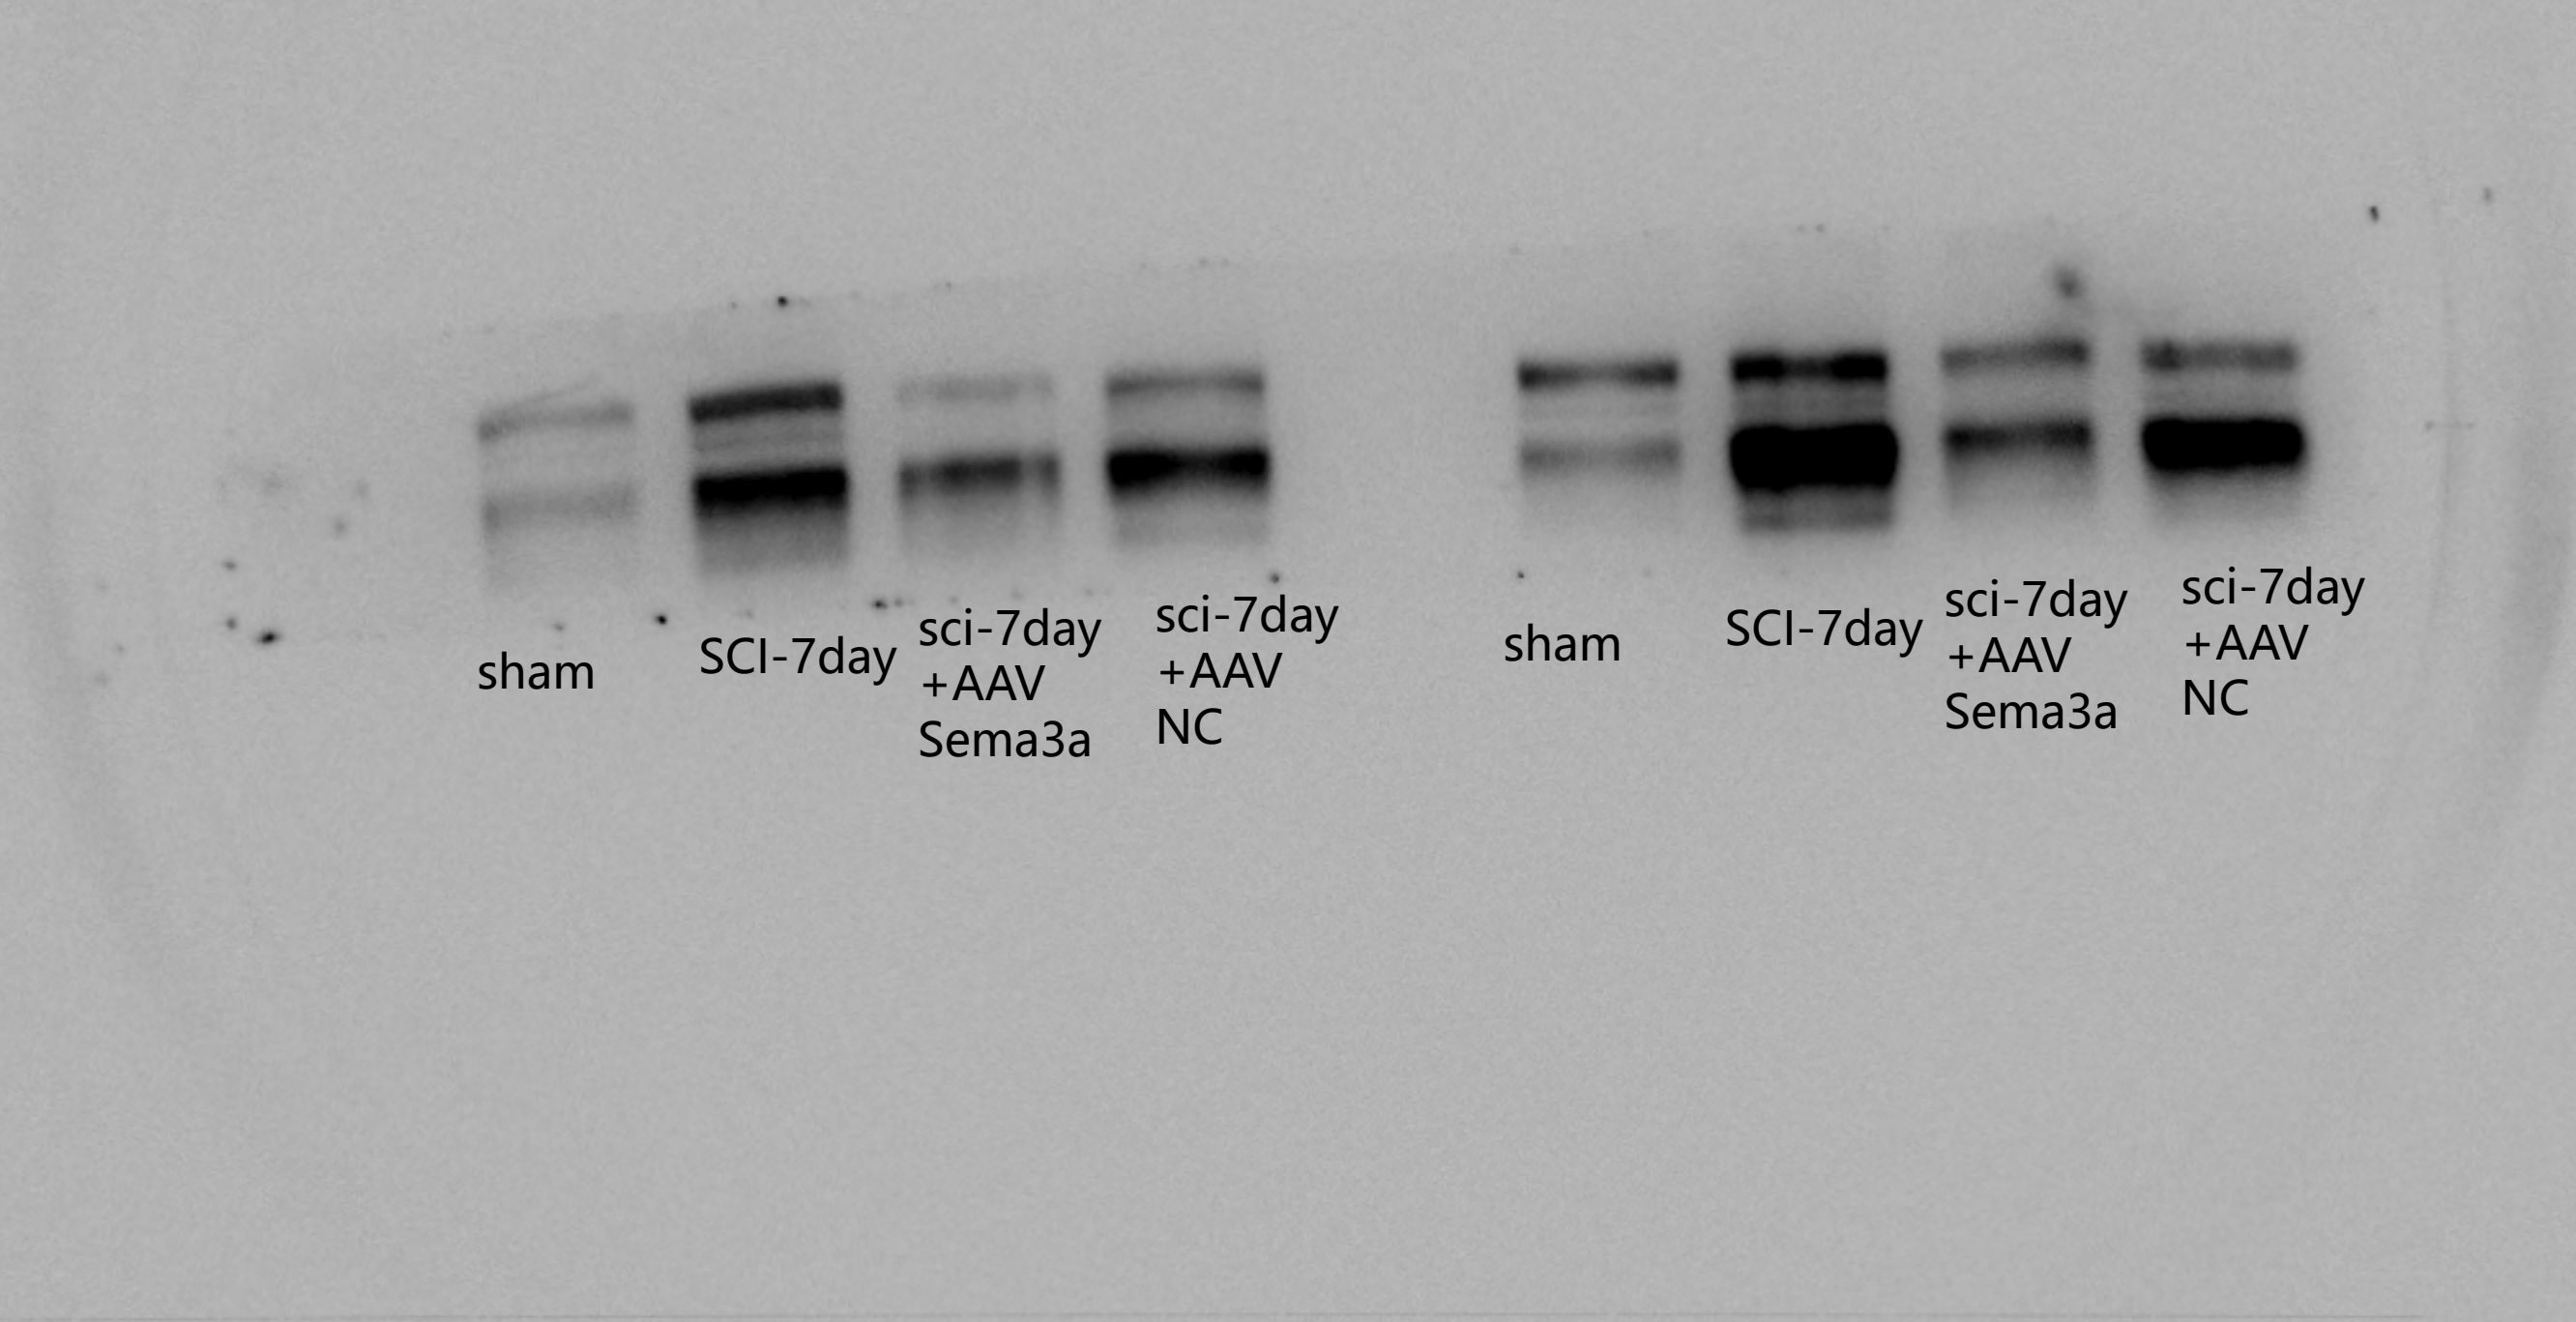

Supplement: WB_(2).zip [file WB_%282%29.zip]

β-actin

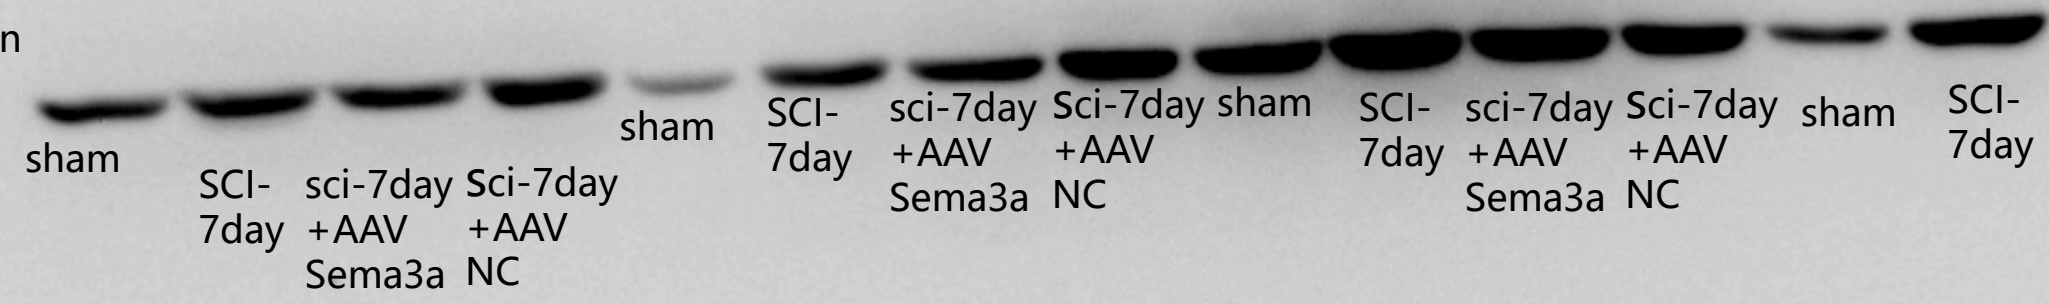

Supplement: WB_(2).zip [file WB_%282%29.zip]

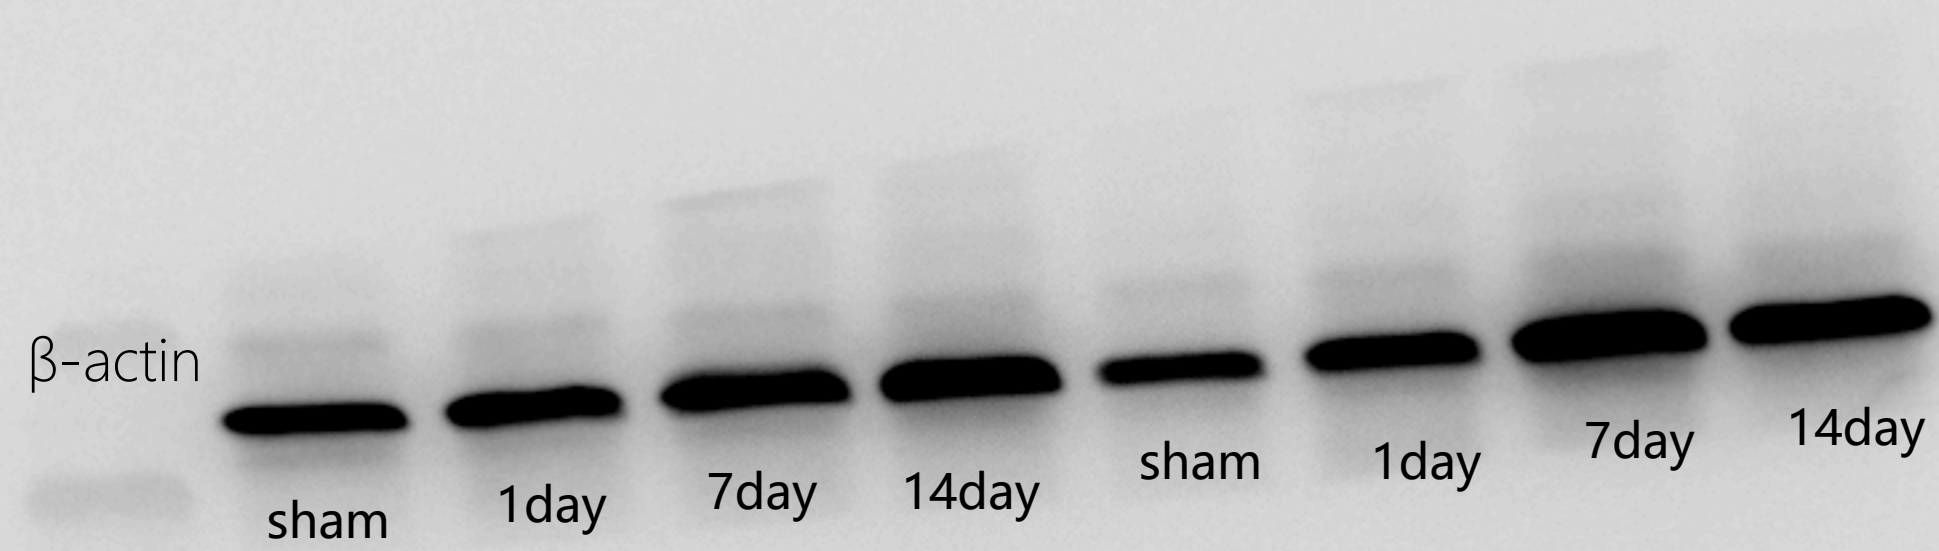

Supplement: WB_(2).zip [file WB_%282%29.zip]

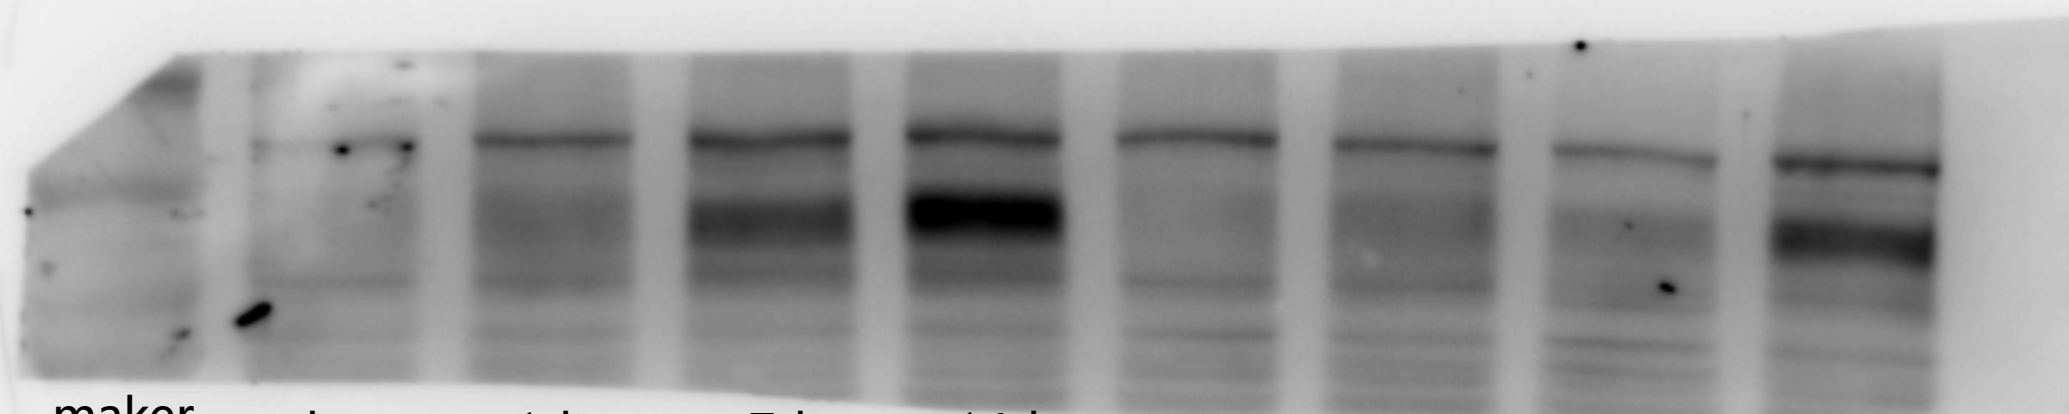

maker

sham

1day

7day

14day

sham

1day

7day

14day

Supplement: WB_(2).zip [file WB_%282%29.zip]

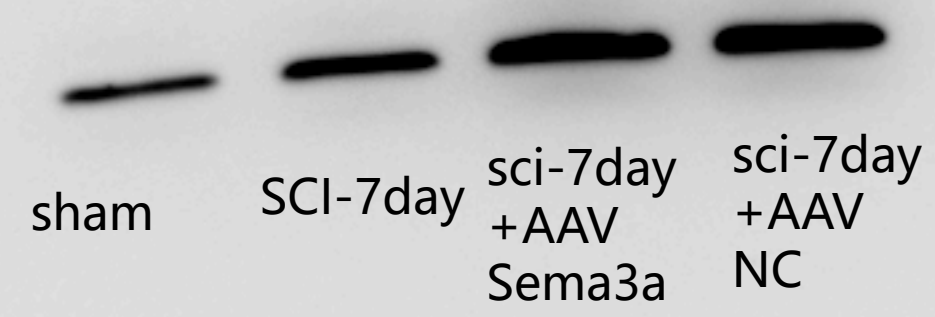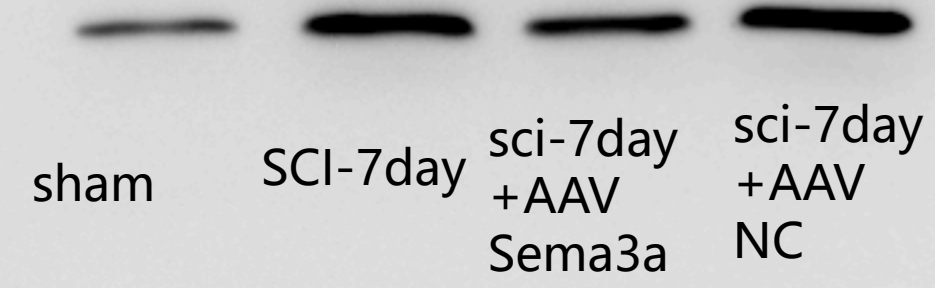

Supplement: WB_(2).zip [file WB_%282%29.zip]

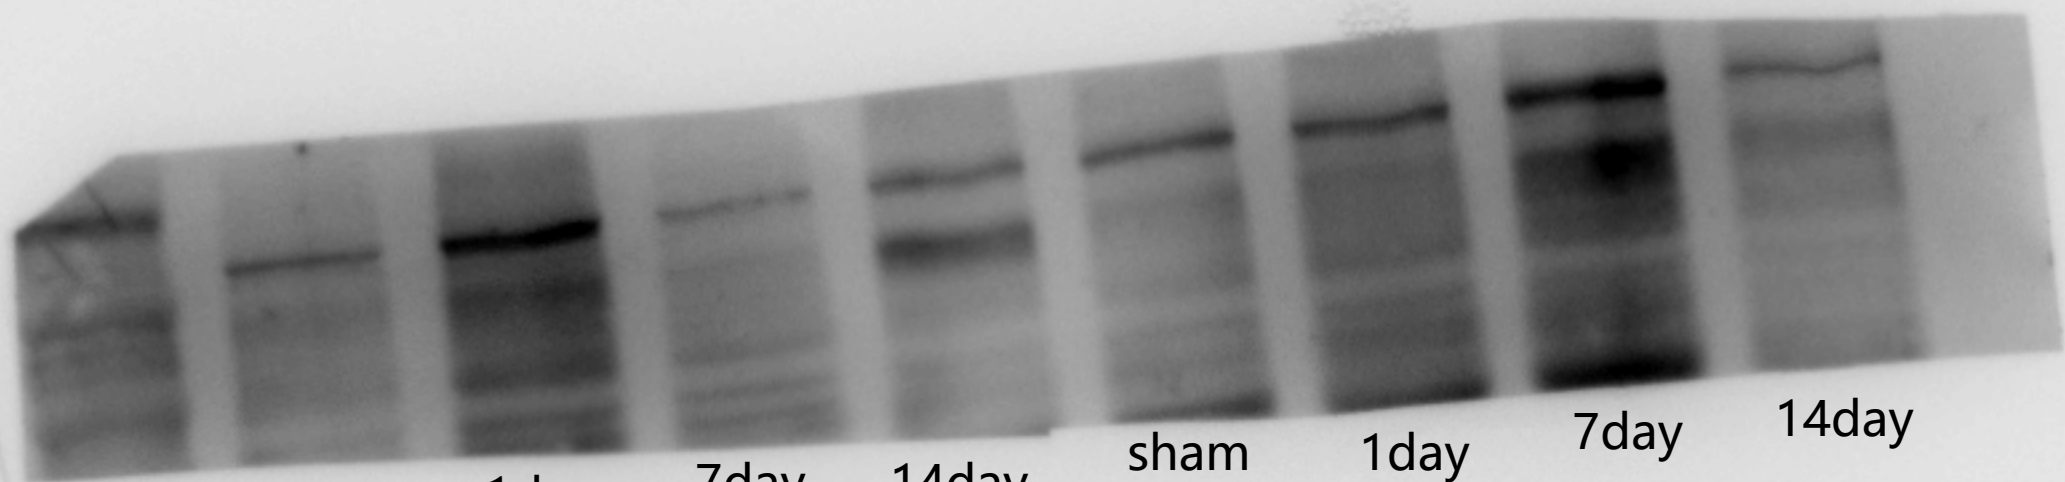

sham

1day

7day

14day

sham

1day

7day

14day

Supplement: WB_(2).zip [file WB_%282%29.zip]

$\beta$ -actin

sham

1day

7day

14day

sham

1day

7day

14day

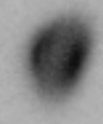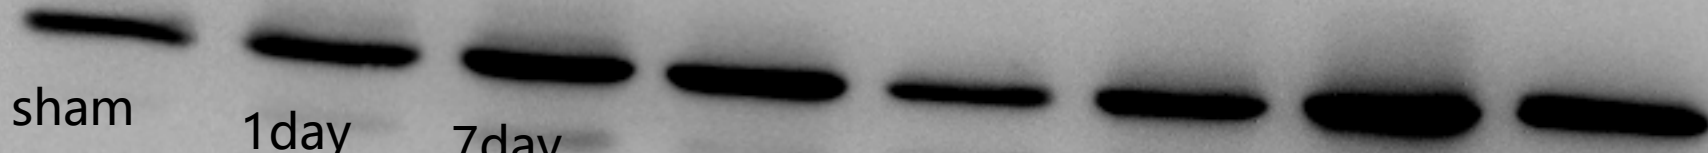

Supplement: WB_(2).zip [file WB_%282%29.zip]

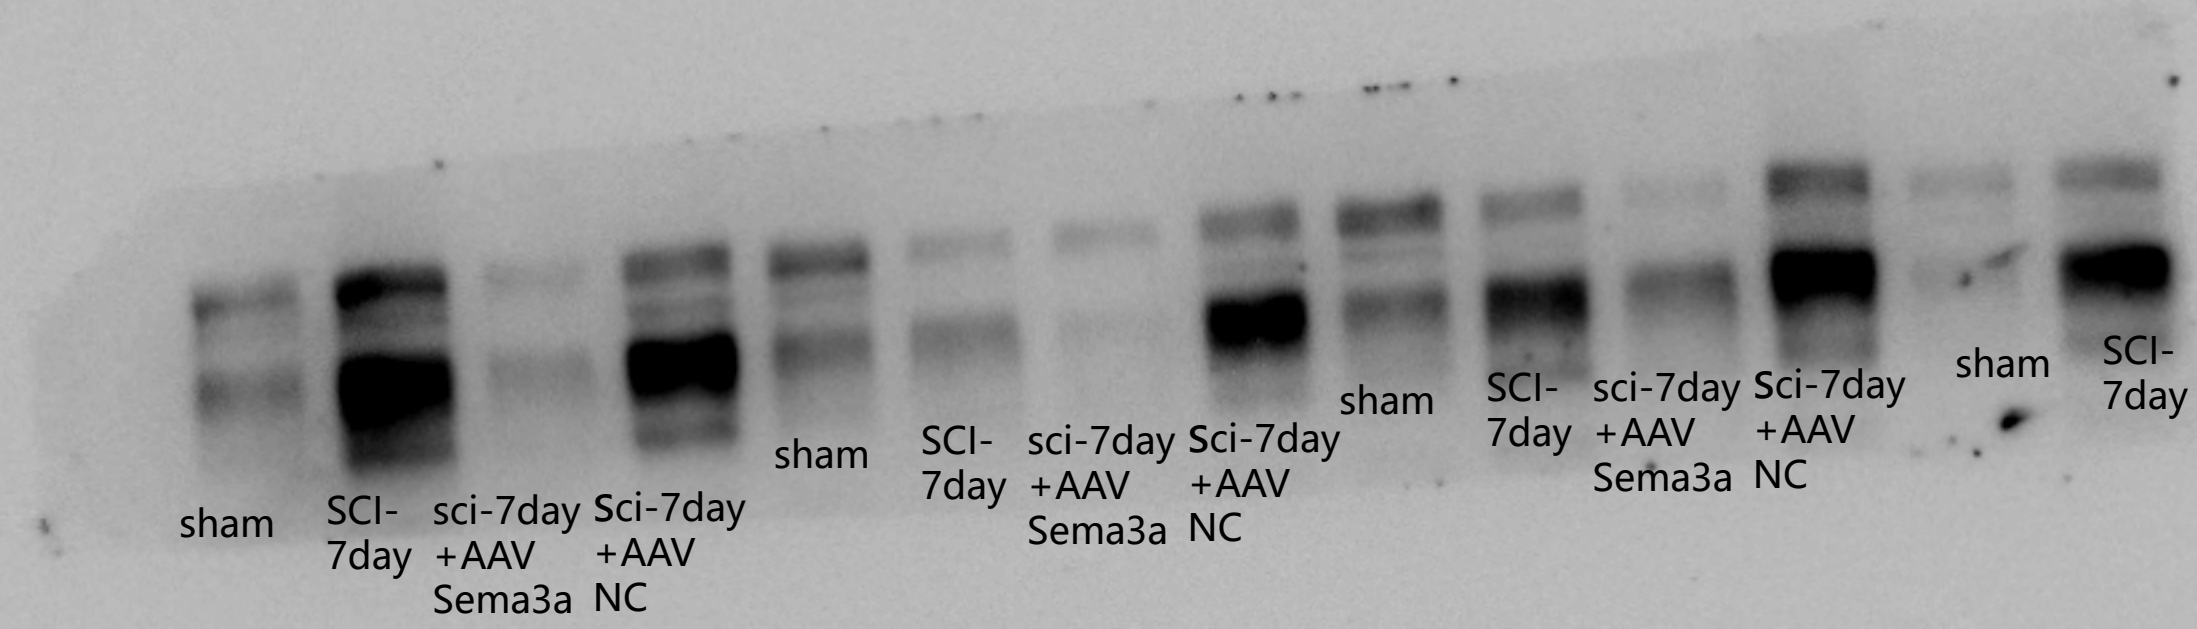

Supplement: WB_(2).zip [file WB_%282%29.zip]
